1 Age-related increases in reaction time result from  
2 slower preparation, not delayed initiation  
3

4 Robert M Hardwick\*,<sup>1,2,3</sup>, Alexander D. Forrence<sup>1</sup>, Maria Gabriela Costello<sup>4,5,6</sup>, Kathy  
5 Zackowski<sup>1,5,6</sup>, and Adrian M Haith<sup>1</sup>

6  
7 \*Address correspondence to [robert.hardwick@uclouvain.be](mailto:robert.hardwick@uclouvain.be)

8 <sup>1</sup> Department of Neurology, Johns Hopkins University, Baltimore, USA

9 <sup>2</sup> Department of Kinesiology, KU Leuven, Belgium

10 <sup>3</sup> Institute of Neurosciences, UC Louvain, Belgium

11 <sup>4</sup> Laboratory of Sensorimotor Research, National Eye Institute, Bethesda, USA

12 <sup>5</sup> Center for Movement Studies, Kennedy Krieger Institute, Baltimore, USA

13 <sup>6</sup> Department of Physical Medicine and Rehabilitation, Johns Hopkins School of Medicine, Baltimore, USA

14

15

16

17

18 **Abstract**

19           Recent work indicates that healthy younger adults can prepare accurate responses faster  
20 than their voluntary reaction times indicate, leaving a seemingly unnecessary delay of 80-100ms  
21 before responding. Here we examined how the preparation of movements, initiation of  
22 movements, and the delay between them are affected by age. Participants made planar reaching  
23 movements in two conditions. The 'Free Reaction Time' condition assessed the voluntary reaction  
24 times at which participants responded to the appearance of a stimulus. The 'Forced Reaction  
25 Time' condition assessed the minimum time actually needed to prepare accurate movements by  
26 controlling the time allowed for movement preparation. The time taken to both initiate movements  
27 in the Free Reaction Time and to prepare movements in the Forced Response condition  
28 increased with age. Notably, the time required to prepare accurate movements was significantly  
29 shorter than participants' self-selected initiation times; however, the delay between movement  
30 preparation and initiation remained consistent across the lifespan (~90ms). These results indicate  
31 that the slower reaction times of healthy older adults are not due to an increased hesitancy to  
32 respond, but can instead be attributed to changes in their ability to process stimuli and prepare  
33 movements accordingly, consistent with age-related changes in brain structure and function.

34

## 35 Introduction

36 Adult human reaction times in response to simple tasks slow with age at a rate of 2-6ms  
37 per decade<sup>1-3</sup>. More complex tasks are associated with greater reaction time differences between  
38 healthy young and old participants<sup>3</sup>. These increases in response times have been attributed to  
39 changes in both the physical capabilities and the self-selected behaviors of older adults. Age-  
40 related changes in brain physiology are associated with reductions in the speed of information  
41 processing<sup>4</sup>. Compared to younger adults, older individuals have reduced grey matter volumes  
42<sup>5</sup>, reductions in white matter integrity<sup>6</sup>, and recruit additional neural resources when completing  
43 tasks<sup>7</sup>, all of which could contribute to slower sensorimotor processing times. A second factor  
44 that may contribute to this decline comes from research suggesting that older adults take a more  
45 cautious approach when performing tasks<sup>8</sup>. For tasks in which performance is governed by a  
46 speed-accuracy trade-off<sup>9</sup>, younger adults appear to balance speed and accuracy in a way that  
47 achieves a high rate of correct responses, while older adults reportedly focus on minimizing errors  
48 at the cost of being slower<sup>10-12</sup>. It is unclear which of these explanations – slower processing or  
49 greater cautiousness – is primarily responsible for the general increase in reaction times with  
50 ageing.

51 Cautiousness to respond (i.e. focusing on accuracy over speed) appears to occur even in  
52 tasks that one might expect to be highly reactive, such as reaching to a visual target. We have  
53 recently shown that healthy younger adults can detect a target location and prepare an accurate  
54 movement in as little as 150 ms, but introduce a delay of 80-100ms before voluntarily initiating a  
55 response<sup>13</sup>, seemingly to avoid committing errors in which responses were initiated before they  
56 had been prepared. Here our goal was to quantify the effects of aging on movement preparation,  
57 movement initiation, and the relationship between them. We hypothesized that if healthy older  
58 adults delay their actions in order to favor accuracy, the delay between the minimum time required  
59 to prepare movements and the time at which they are voluntarily initiated may increase with age.

60           In the present study we therefore examined the extent to which the slower reaction times  
61 of healthy older individuals are due to a slowing of their ability to process perceptual information  
62 and prepare appropriate movements (i.e. due to an overall reduction in processing speed), and/or  
63 an increase in the delay between when their movements are prepared and initiated (e.g. favoring  
64 accuracy over speed to avoid the risk of making an error). Participants completed a planar  
65 reaching task, and their reaction times were measured in two different conditions. The 'Free  
66 Reaction Time' condition (equivalent to standard "choice reaction time" testing), assessed the  
67 time at which participants would voluntarily initiate movements in response to the appearance of  
68 a target. The 'Forced Reaction Time' condition, based on an established psychophysics paradigm  
69 <sup>13-17</sup>, forced participants to respond at lower-than-normal reaction times, allowing us to determine  
70 the amount of time they needed to prepare accurate responses. Our results indicate that the time  
71 participants required to both initiate and prepare responses increased with age; however, the  
72 delay between preparation and initiation of movements remained invariant at around 90ms. These  
73 results indicate that the slower reaction times of healthy older adults observed in this task were  
74 not due to an increased hesitancy to respond, but can instead be wholly attributed to declines in  
75 the ability to process stimuli and prepare accurate movements.

76

## 77 Methods

78 54 human participants completed the study. All participants had no known neurological  
79 disorders and provided written informed consent prior to their participation. All procedures were  
80 approved by the Johns Hopkins University School of Medicine Institutional Review Board.

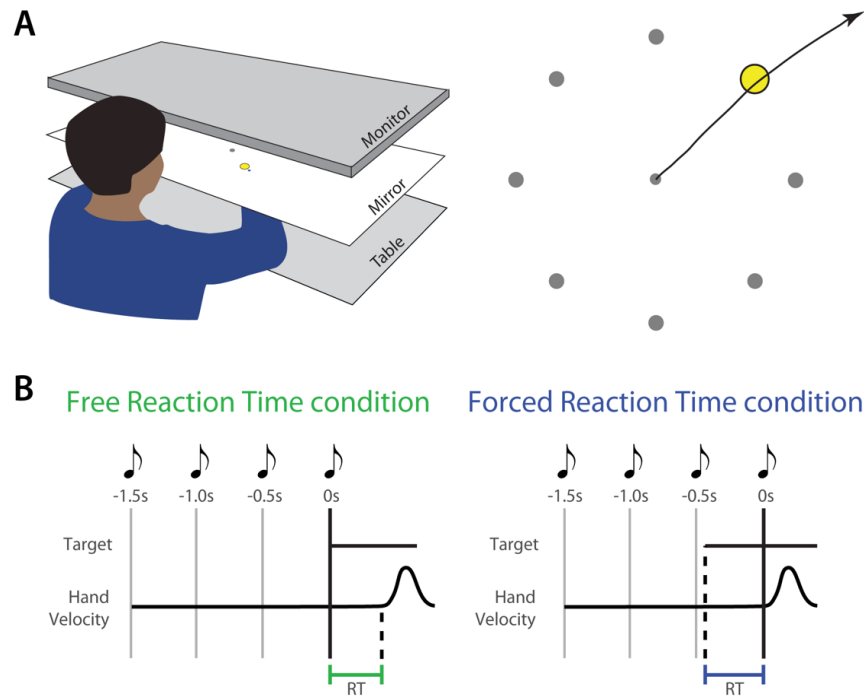

81

82 *Figure 1: Apparatus and Experimental Conditions. A) Participants made planar reaching*  
83 *movements to interact with an on-screen display. Participants made ballistic 'shooting' actions*  
84 *with the goal of passing the cursor through a target. The target appeared in one of eight locations.*  
85 *B) Experimental conditions. In the Free Reaction Time condition the target appeared at a fixed*  
86 *time cued by a sequence of tones. Participants attempted to respond by initiating a movement as*  
87 *soon as possible. In the Forced Reaction Time condition participants always initiated movements*  
88 *at a fixed time (synchronously with the final tone in a sequence of four). The target appeared at a*  
89 *random time prior to movement; the time between target presentation and the fourth tone*  
90 *therefore imposed a limited response time.*

## 91 ***Apparatus***

92 Participants sat at a glass-surfaced table with their dominant arm supported by an air sled,  
93 allowing frictionless 2D movements in the horizontal plane (see Figure 1). A monitor and mirror  
94 setup allowed presentation of visual targets in the same plane as the arm. Hand position was  
95 tracked at 130Hz using a Flock of Birds motion tracking system (Ascension Technologies).

96 Participants moved their hand to control the position of a cursor (blue circle, 5mm  
97 diameter). Each trial began with the cursor in a central start position (green circle, 10mm  
98 diameter). The two experimental conditions (Free and Forced Reaction Time - see below)  
99 required participants to make a ballistic arm movement (i.e. movements that use feedforward  
100 control with little opportunity to make online corrections to their movement; <sup>18</sup> with the goal to pass  
101 the cursor through a target (grey circle, 25mm diameter). The target could appear in one of eight  
102 locations, each spaced equally around the start position at a distance of 80mm.

### 103 ***Free Reaction Time Condition***

104 Participants were instructed to react as quickly as possible to the appearance of a target.  
105 The timing of stimulus presentation was predictable, occurring synchronously with the final tone  
106 in a sequence of four equally spaced tones (500ms separation). This cuing reduced ambiguity  
107 regarding the timing of stimulus presentation, which reduces reaction times and their variability  
108 <sup>19</sup>. Participants completed 1-4 blocks (each 96 trials) of Free Reaction Time trials (the number of  
109 blocks varied depending on the time available to test the participant). The targets appeared in a  
110 pseudorandom sequence, with each target appearing 12 times per block.

### 111 ***Forced Reaction Time Condition***

112 The Forced Reaction Time condition used an established paradigm that requires  
113 participants to respond at a fixed time within each trial <sup>13-17</sup>. Participants heard a sequence of four

114 equally spaced tones (500ms separation), and were trained to initiate their movements  
115 synchronously with the onset of the fourth and final tone. Different reaction times were imposed  
116 by varying the time at which the target was presented relative to the required time of movement  
117 onset. Participants were instructed that while both the timing and the accuracy of their movements  
118 was important in this condition, their highest priority was to attempt to begin their response  
119 synchronously with the fourth tone. If participants failed to initiate their movement within +/-75ms  
120 of this time, on-screen feedback informed them that they were "Too early" or "Too late". If  
121 participants failed to time their movement accurately on three consecutive trials the experimenter  
122 also provided additional feedback, reiterating the instruction that accurate timing was their highest  
123 priority in this condition. In initial training blocks the target appeared at the onset of the trial,  
124 allowing the participant 1500ms to prepare a response. Participants trained until they could  
125 accurately time the initiation of their movement in at least 35/50 trials, or until they completed  
126 2x50-trial practice blocks. Participants then completed trials with variable target presentation  
127 times. In each block, target presentation varied uniformly between 0 and 350ms prior to the fourth  
128 tone. In some cases, this range was extended to 500ms – specifically in older adults who failed  
129 to produce correct responses in the earlier time window. Each block began with two 'warm up'  
130 trials in which the target appeared with the first tone. Participants completed 2-4 blocks (106 trials  
131 each) of Forced Reaction Time trials (the variable number of blocks depended on the time  
132 available to test the participant and their adherence to instructions).

### 133 ***Data Analysis***

134 Hand position was processed with a second order Savitzky-Golay filter (half-width 54ms).  
135 Movement onset was calculated as the time at which tangential hand velocity first exceeded  
136 0.02m/s. We subtracted the mean delay in the recording system (measured to be 100ms) to  
137 provide a more accurate measure of true reaction time. Reaction time in both the Free Reaction  
138 Time and Forced Reaction Time conditions was calculated as the delay between the onset of the

139 stimulus and movement onset. Initial movement direction was calculated from the direction of the  
140 hand's velocity 100ms after movement onset.

141 Data from the Forced Reaction Time condition was used to model the probability of  
142 initiating an accurate movement at a given reaction time (i.e. a speed-accuracy trade-off) based  
143 on a previously established approach<sup>13,17</sup>. Movements were considered to have been initiated in  
144 the correct direction if the initial movement direction was within 22.5° of the target. For data  
145 visualization purposes, the proportion of movements initiated in the correct direction was  
146 calculated for a 20ms sliding window around each potential reaction time. For analysis, a speed-  
147 accuracy trade-off was modeled as a cumulative Gaussian distribution centered on time  $T_p$  (thus  
148  $T_p \sim N(U_p, \sigma_p^2)$ ). This assumes movements before  $T_p$  were directed randomly with respect to the  
149 true target location, while movements after  $T_p$  were initiated in the correct direction with some  
150 probability  $\alpha$ . Parameters were estimated from the data for each individual participant using a  
151 maximum likelihood approach.

152 Statistical analyses were conducted using JASP (0.13.1.0). The relationship between  
153 movement preparation and initiation was analyzed using a repeated measures ANOVA  
154 ( $_{RM}$ ANOVA). The  $_{RM}$ ANOVA assessed the within-subjects factor of Time - Initiation Time  
155 (calculated using the Free Reaction Time condition) was compared to Preparation Time  
156 (calculated using the Forced Reaction Time condition), with Age included as a covariate. Further  
157 correlation and regression analyses assessed whether Age affected Initiation Time, Preparation  
158 Time, or the delay between them (i.e. Initiation Time minus Preparation Time). Additional  
159 Bayesian analyses were conducted to determine the level of evidence in support of the null  
160 hypothesis ( $BF_{01}$ ) where appropriate.

161 A series of control analyses examined the effects of the different experimental conditions,  
162 and participant age, on behavior. We first conducted correlation and regression analyses to



163 determine whether participants completed the Free and Forced Reaction Time conditions with  
164 similar peak movement velocities. Possible differences were considered in a  $_{RM}$ ANOVA  
165 comparing peak movement velocity across conditions (Free vs Forced Reaction Time conditions),  
166 including Age as a covariate. Further correlation and regression analyses considered the  
167 relationship between participant Age and peak movement velocity in the Free and Forced  
168 Reaction Time conditions. Further analyses examined possible effects of Age on participant  
169 behavior in the Forced Reaction Time condition. Possible effects of Age on asymptotic accuracy  
170 (identified based on the model fit to the data for each participant) was examined using correlation  
171 and regression analyses. Possible effects of Age on timing accuracy were also assessed;  
172 Response Asynchrony was calculated as the difference in time between the fourth tone and the  
173 start of the participant's response <sup>20</sup>. Negative values therefore corresponded to moving before  
174 the fourth tone, and positive values corresponded to moving after the fourth tone. Correlation and  
175 regression analyses then assessed the possible relationship between Age and Response  
176 Asynchrony.

177 All regression analyses are presented with bootstrapped 95% confidence intervals,  
178 calculated using resampling with replacement, and the same resamples of participants are used  
179 across all analyses, consistent with a repeated measures design <sup>21</sup>. A linear model was fit to each  
180 resampled population, and a line of best fit was then interpolated from the model parameters. This  
181 process was repeated 10,000 times, with the 2.5 and 97.5 percentiles of the interpolated fits being  
182 used as confidence intervals.

183

## 184 Results

### 185 *Initiation time and preparation time dissociate*

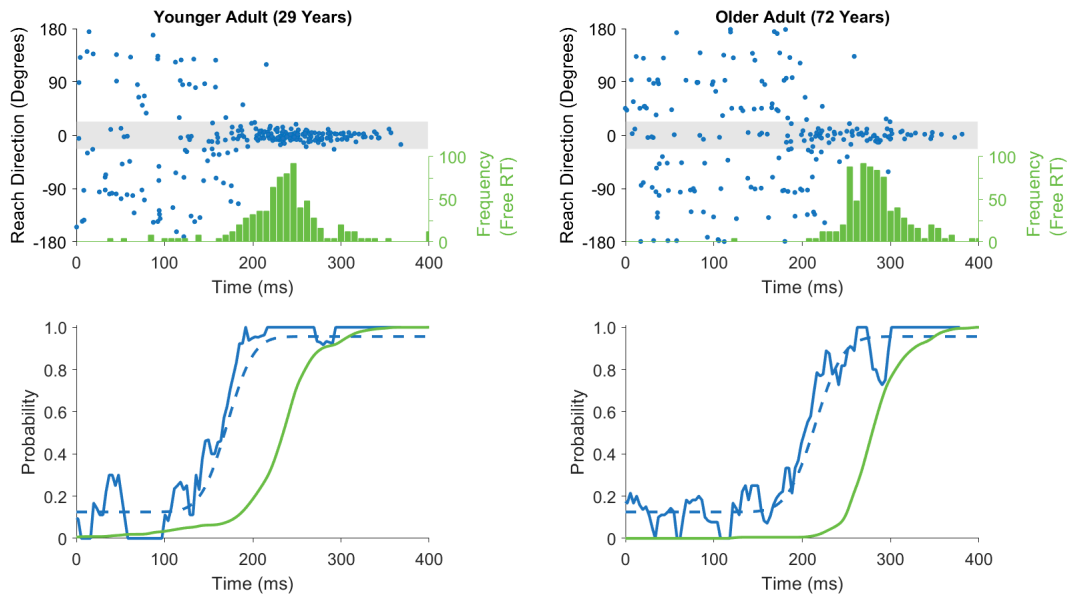

186

187 *Figure 2: Data from example participants. Upper panels show the distribution of reaction times in*  
188 *the Free Reaction Time condition (green histogram) and responses from individual trials in the*  
189 *Forced Reaction Time condition (blue dots). Responses falling within the grey shaded area were*  
190 *initiated in the correct direction. Lower panels show a processed version of the data for the subject*  
191 *above. The solid green lines present a cumulative distribution of reaction times from the Free*  
192 *Reaction Time condition. Blue lines present data from the Forced Reaction Time condition; solid*  
193 *blue lines show a sliding window of successful responses, while dashed blue lines represent*  
194 *model fit to the data based on a cumulative Gaussian.*

195 In line with our previous work, we found a significant difference between Initiation Time,  
196 as measured using the Free Reaction Time condition, and Preparation Time, as measured using  
197 the Forced Reaction Time condition,  $F_{1,52}=77.7$ ,  $p<0.001$  (see Figure 2 for example data).  
198 Participants' reaction times were significantly longer than the time they needed to prepare an  
199 accurate action in the Forced Reaction Time condition ( $t=24.82$ ,  $p<0.01$ , mean Initiation Time

200 (Free Reaction Time condition) =  $290 \pm 34$ ms, mean Preparation Time (Forced Reaction Time  
201 condition) =  $195 \pm 26$ ms, mean difference =  $94 \pm 28$ ms).

202 **Both initiation time and preparation time increase with age**

203 While Age was not a significant covariate in the  $R_M$ ANOVA comparing participant Reaction  
204 and Preparation Times ( $F_{1,52}=0.032$ ,  $p=0.86$ ), there was a significant between-subjects effect of  
205 Age ( $F_{1,52}=8.0$ ,  $p=0.007$ ) on the main factor of Time. Further analyses assessed the correlation  
206 between Age, Reaction Time, and Preparation Time. Replicating the findings of previous research  
207 we found that increased age was related to a significant increase in reaction times in the Free  
208 Reaction Time condition ( $r=0.28$ ,  $p=0.04$ ; Figure 3, left panel). Analysis of data from the Forced  
209 Reaction Time condition also revealed that movement preparation time increased significantly  
210 with Age ( $r=0.39$ ,  $p=0.003$ ; Figure 3, central panel).

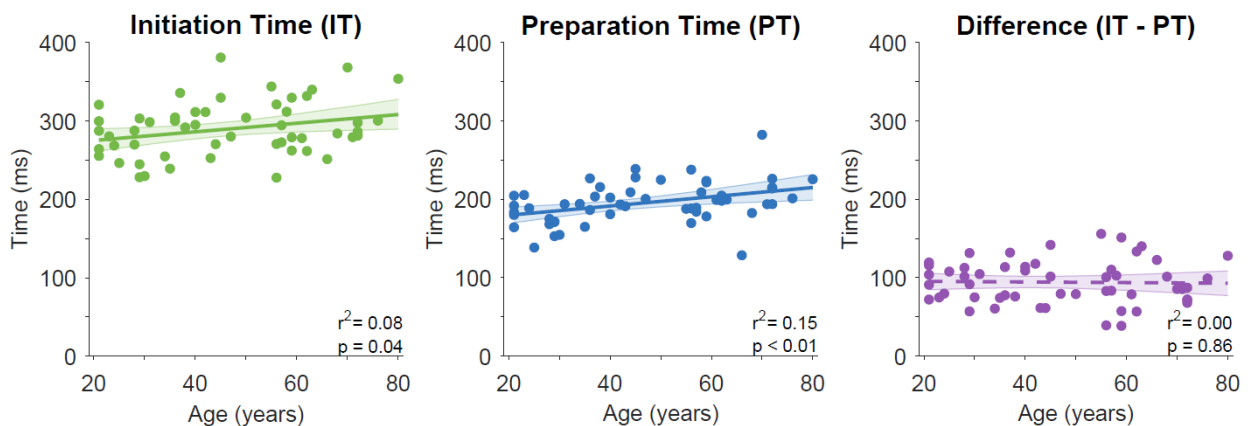

211

212 *Figure 3: Relationships between Age and movement Initiation Time (Free Reaction Time*  
213 *condition), Preparation Time (Forced Reaction Time condition), and the delay between movement*  
214 *Preparation and Initiation. Each point presents data from a single subject. Solid line presents*  
215 *linear regression on the data, dashed lines present non-significant regression lines. Error bars*  
216 *present bootstrapped 95% confidence intervals.*

217 **Age does not affect the delay between movement preparation and initiation**

218 The delay between movement preparation and initiation was calculated for each  
219 participant by taking their mean reaction time, as established in the Free Reaction Time condition,  
220 and subtracting their mean preparation time, established based on the speed-accuracy trade-off  
221 observed in the Forced Reaction Time condition (Figure 4). As identified in an earlier analysis, all  
222 participants exhibited a delay between movement Preparation and Initiation (mean±SD =  
223 94±28ms). There was, however, no significant relationship between age and the duration of the  
224 delay (Figure 3, right panel;  $r=-0.025$ ,  $p=0.86$ ). Further analysis using Bayesian correlation  
225 indicated there was substantial support for the null hypothesis ( $BF_{01} = 5.801$ )<sup>21</sup>.

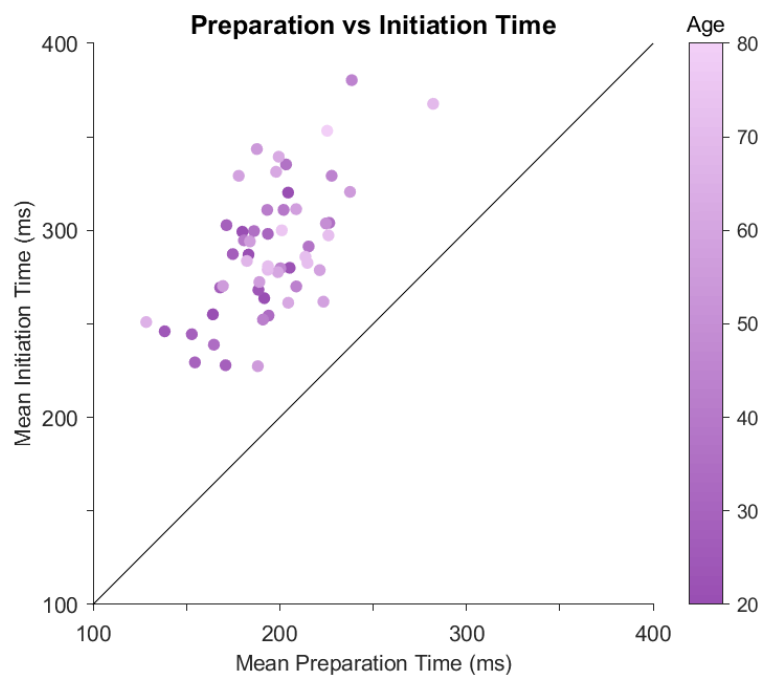

226

227 *Figure 4: Preparation Time vs Initiation Time. Each circle represents one participant, with lighter*  
228 *colors presenting increasingly older participants. Note that each participant's Initiation Time*  
229 *(average of reaction times for that participant in the Free Reaction Time condition) was greater*  
230 *than their Preparation Time (average time of response preparation based on a model fit to data*  
231 *for that participant in the Forced Reaction Time condition).*

232 **Peak movement velocity was correlated across conditions and decreased with age**

233 Control analyses examined whether peak movement velocity affected performance within  
234 and across conditions. Participant peak movement velocity in the Free and Forced Reaction Time  
235 conditions was highly correlated ( $r=0.82$ ,  $p<0.001$ ; Figure 5, left panel). A corresponding  
236  $_{RM}ANOVA$  found no significant difference between peak movement velocity in the Free and  
237 Forced Reaction Time conditions ( $_{RM}ANOVA$ ,  $F_{1,52}=0.87$ ,  $p=0.36$ ). These analyses suggested that  
238 participant movement speeds were relatively consistent between the two conditions. As older age  
239 is associated with slower movement speeds, we also examined whether peak movement velocity  
240 differed with Age. Age was not a significant covariate in the  $_{RM}ANOVA$  ( $F_{1,52}=0.31$ ,  $p=0.58$ ), but  
241 the analysis indicated a trend for Age as a between-subjects effect on peak velocity ( $_{RM}ANOVA$ ,  
242  $F_{1,52}=3.7$ ,  $p=0.06$ ). Correlation analyses suggested that peak velocities increased with age, with  
243 trends for this effect in both the Free Reaction Time condition ( $r=-0.26$ ,  $p=0.055$ ; Figure 5, central  
244 panel) and Forced Reaction Time condition ( $r=-0.24$ ,  $p=0.088$ ; Figure 5, right panel).

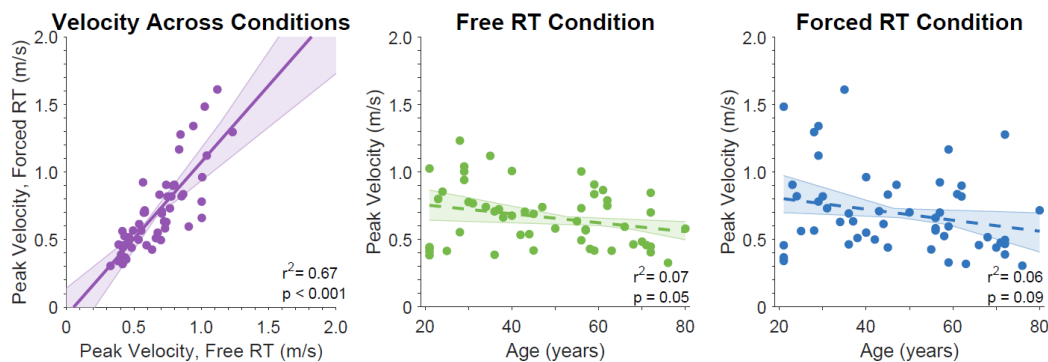

245  
246 *Figure 5: Analyses of peak velocity. Left panel shows correlation between Peak velocity in the*  
247 *Free and Forced Reaction Time conditions. Central and Right panels show correlations between*  
248 *peak velocity and age in the Free and Forced Reaction Time conditions, respectively. Each point*  
249 *presents data from a single subject. Solid line presents linear regression on the data, dashed lines*  
250 *present non-significant regression lines. Error bars present bootstrapped 95% confidence*  
251 *intervals.*

252 Further analysis examined whether differences in movement speed across ages might have  
253 accounted for the observed differences in preparation time and initiation time. We found no  
254 significant relationship between reaction time and peak velocity in the Free Reaction Time  
255 Condition ( $r=-0.14$ ,  $p=0.30$ ; Figure 6, left panel), or the Forced Reaction Time Condition ( $r=-0.18$ ,  
256  $p=0.19$ , Figure 6, right panel).

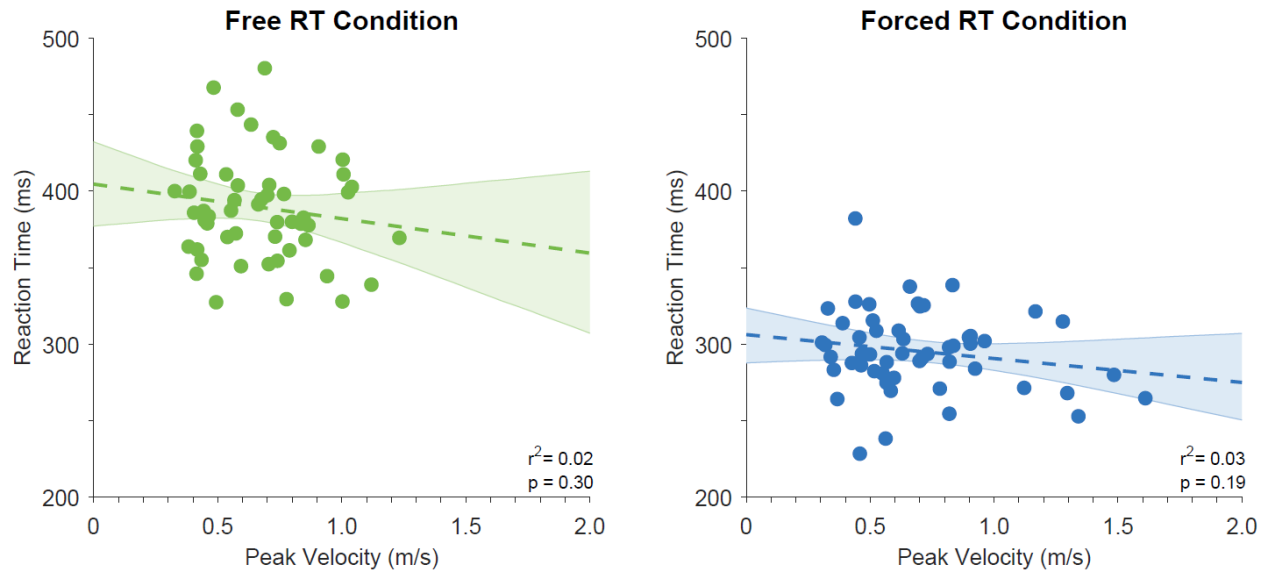

257

258 *Figure 6: Comparisons of peak velocity and reaction time for the Free Reaction Time condition*  
259 *(left) and Forced Reaction Time (right) conditions. Each point presents data from a single subject.*  
260 *Dashed lines present non-significant regression lines. Error bars present bootstrapped 95%*  
261 *confidence intervals.*

262

263 ***Asymptotic accuracy in the Forced Reaction Time condition decreased with age***

264 A correlation analysis indicated that asymptotic accuracy in the Free Reaction Time  
265 condition decreased significantly with age ( $r=-0.34$ ,  $p=0.012$ ; see Figure 7). This decline occurred  
266 at a relatively low rate (0.0017% decrease in accuracy per year), corresponding to an approximate  
267 decrease of 11% from ages 20 to 80 (97% vs 86% accuracy, respectively).

268

269 ***Timing (Asynchrony) in the Forced Reaction Time condition did not differ with age***

270 A final analysis examined participant's ability to time their responses in the Forced  
271 Reaction Time condition to coincide with the fourth tone. Asynchrony did not differ significantly  
272 with age ( $r=0.15$ ,  $p=0.29$ : See Figure 7), and Bayesian analysis provided substantial evidence in  
273 support of the null hypothesis ( $BF_{01}=3.4$ )<sup>21</sup>.

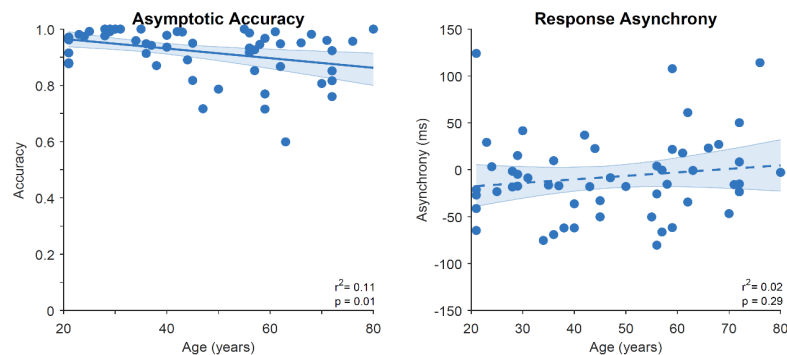

275 *Figure 7: Effects of Age on behavior in the Forced Reaction Time condition. Left panel indicates*  
276 *the significant relationship between Age and Asymptotic Accuracy. Right panel indicates the non-*  
277 *significant relationship between Age and Response Asynchrony. Each point presents data from*  
278 *a single subject. Solid line presents linear regression on the data, dashed lines present non-*  
279 *significant regression lines. Error bars present bootstrapped 95% confidence intervals.*

## 280 Discussion

281 We used a visually-guided planar reaching task to measure reaction times and assess the  
282 time participants needed to prepare accurate movements. In line with previous studies, we found  
283 that 'Free' reaction times increased linearly with age<sup>1-3</sup>. We compared these data to performance  
284 in a 'Forced Reaction Time' condition, in which we measured the minimum time participants  
285 required to prepare accurate movements by forcing them to respond with shorter-than-normal  
286 response times. The time required to prepare accurate movements also increased linearly with  
287 age, and was significantly shorter than the reaction time, replicating our previous observation that  
288 movements are not immediately initiated once they are prepared<sup>13</sup>. Further analysis identified  
289 that age had no significant effect on the delay between movement preparation and initiation.  
290 These results indicate that the slower reaction times of healthy older adults observed in this task  
291 were not due to an increased hesitancy to respond, but can instead be wholly attributed to  
292 declines in the ability to process stimuli and prepare accurate movements.

293 Healthy human aging is associated with changes in motor behavior including declines in  
294 coordination, increased kinematic variability, and a reduced ability to modify movements to  
295 respond to changes in the environment<sup>21,22</sup>. Such age-related changes in behavior are  
296 accompanied by changes in brain structure and function<sup>6-8</sup>. The increase in the amount of time  
297 required to prepare movements with age, as identified here, is consistent with these previous  
298 findings. Previous work has also suggested that healthy older adults prefer to respond with longer  
299 reaction times to ensure accurate responses<sup>10-12</sup>. Here we found no evidence of such age-related  
300 delays in responding. We note, however, that the simple reaching task used here had relatively  
301 low cognitive demands. Age-related declines in performance are exacerbated by increased task  
302 complexity and/or greater cognitive demand<sup>3</sup>, consistent with frequently demonstrated  
303 differences between cognitive and motor functions<sup>23,24</sup>. We therefore propose that the reported



304 delaying of action in those studies may not represent a 'default policy' for older adults, but could  
305 instead occur in response to increases in task complexity.

306 Further analyses indicated that increasing age was associated with slower peak  
307 movement velocities in all conditions, and decreases in asymptotic accuracy in the Forced  
308 Reaction Time condition. This drop in accuracy may have reflected an increased propensity for  
309 lapses in concentration, particularly given the dual demands of timing and accuracy in the Forced  
310 Reaction Time condition. Skilled motor performance is characterized by both speed and accuracy  
311 <sup>25-29</sup>, and the present data are consistent with aforementioned and well-established age-related  
312 declines in movement control. By contrast, there was no significant effect of age on the ability to  
313 synchronize responses with the fourth tone, as evidenced by the analysis of Response  
314 Asynchrony in the Forced Reaction Time condition. Note, however, that this does not necessarily  
315 reflect spontaneous, self-selected participant behavior. Instructions to participants in the Forced  
316 Reaction Time condition emphasized that while both the accuracy and timing of their responses  
317 were important, timing was the highest priority. Older adults may have had greater asynchrony  
318 (due to a tendency to delay their movements to wait for the target to appear, so they could reach  
319 in the correct direction) without this intervention. We therefore conclude that increasing age was  
320 associated with a decrease in overall performance (i.e. older adults had longer Initiation Times,  
321 longer Preparation Times, lower peak movement velocities, and were less accurate).

322 In summary, our results are consistent with previous observations that humans delay the  
323 initiation of prepared movements, and show that the size of this delay remains constant across  
324 the lifespan. The consistent duration of this delay indicates that healthy older adults do not appear  
325 to change their behavior in relatively simplistic response time tasks in order to favor accuracy at  
326 the expense of speed. The declines in their performance observed here can instead be wholly  
327 attributed to age-related changes in their capability to process and prepare movements.

328 **Acknowledgements**

329 This work was supported by NSF grant 1358756. This project has received funding from the  
330 European Union's Horizon 2020 research and innovation programme under the Marie  
331 Skłodowska-Curie grant agreement No 702784 (RMH). RMH is supported by grants from the  
332 UC Louvain special research fund (1C.21300.057 and 1C.21300.058). We thank Jeff Gooding  
333 for assistance with data collection.

334

335 **Author Contributions**

336 RMH conceived the research. RMH, AF, and MGC collected the data. RMH analyzed the data.  
337 RMH drafted the manuscript. RMH, AF, MGC, KZ and AH revised the draft.

338

339 **Additional Information**

340 The authors declare no competing interests.

341

342 **Data Availability**

343 The datasets generated during and/or analysed during the current study are available from the  
344 corresponding author on reasonable request.

345

346

347 **References**

- 348 1. Fozard, J. L., Vercryssen, M., Reynolds, S. L., Hancock, P. A. & Quilter, R. E. Age differences  
349 and changes in reaction time: the Baltimore Longitudinal Study of Aging. *J Gerontol* **49**, P179-  
350 189 (1994).
- 351 2. Gottsdanker, R. Age and simple reaction time. *J Gerontol* **37**, 342–348 (1982).
- 352 3. Woods, D. L., Wyma, J. M., Yund, E. W., Herron, T. J. & Reed, B. Age-related slowing of  
353 response selection and production in a visual choice reaction time task. *Frontiers in Human*  
354 *Neuroscience* **9**, (2015).
- 355 4. Seidler, R. D. *et al.* Motor control and aging: Links to age-related brain structural, functional,  
356 and biochemical effects. *Neuroscience & Biobehavioral Reviews* **34**, 721–733 (2010).
- 357 5. Giorgio, A. *et al.* Age-related changes in grey and white matter structure throughout  
358 adulthood. *NeuroImage* **51**, 943–951 (2010).
- 359 6. Stadlbauer, A., Salomonowitz, E., Strunk, G., Hammen, T. & Ganslandt, O. Age-related  
360 Degradation in the Central Nervous System: Assessment with Diffusion-Tensor Imaging and  
361 Quantitative Fiber Tracking. *Radiology* **247**, 179–188 (2008).
- 362 7. Heuninckx, S., Wenderoth, N. & Swinnen, S. P. Systems Neuroplasticity in the Aging Brain:  
363 Recruiting Additional Neural Resources for Successful Motor Performance in Elderly Persons.  
364 *J. Neurosci.* **28**, 91–99 (2008).
- 365 8. Dully, J., McGovern, D. P. & O’Connell, R. G. The impact of natural aging on computational  
366 and neural indices of perceptual decision making: A review. *Behavioural Brain Research* **355**,  
367 48–55 (2018).
- 368 9. Fitts, P. M. The information capacity of the human motor system in controlling the amplitude  
369 of movement. *J Exp Psychol* **47**, 381–391 (1954).
- 370 10. Salthouse, T. A. Adult age and the speed-accuracy trade-off. *Ergonomics* **22**, 811–821  
371 (1979).

- 372 11. Smith, G. A. & Brewer, N. Slowness and age: speed-accuracy mechanisms. *Psychol Aging*  
373 **10**, 238–247 (1995).
- 374 12. Starns, J. J. & Ratcliff, R. The effects of aging on the speed-accuracy compromise: Boundary  
375 optimality in the diffusion model. *Psychol Aging* **25**, 377–390 (2010).
- 376 13. Haith, A. M., Pakpoor, J. & Krakauer, J. W. Independence of Movement Preparation and  
377 Movement Initiation. *Journal of Neuroscience* **36**, 3007–3015 (2016).
- 378 14. Ghez, C. *et al.* Discrete and continuous planning of hand movements and isometric force  
379 trajectories. *Exp Brain Res* **115**, 217–233 (1997).
- 380 15. Haith, A. M., Huberdeau, D. M. & Krakauer, J. W. The Influence of Movement Preparation  
381 Time on the Expression of Visuomotor Learning and Savings. *Journal of Neuroscience* **35**,  
382 5109–5117 (2015).
- 383 16. Haith, A. M., Huberdeau, D. M. & Krakauer, J. W. Hedging Your Bets: Intermediate  
384 Movements as Optimal Behavior in the Context of an Incomplete Decision. *PLoS Comput Biol*  
385 **11**, e1004171 (2015).
- 386 17. Hardwick, R. M., Forrence, A. D., Krakauer, J. W. & Haith, A. M. Time-dependent competition  
387 between goal-directed and habitual response preparation. *Nature Human Behaviour* **3**, 1252–  
388 1262 (2019).
- 389 18. Hardwick, R. M., Dagioglou, M. & Miall, R. C. State Estimation and the Cerebellum. in  
390 *Handbook of the Cerebellum and Cerebellar Disorders* (eds. Manto, M., Schmahmann, J. D.,  
391 Rossi, F., Gruol, D. L. & Koibuchi, N.) 1297–1313 (Springer Netherlands, 2013).  
392 doi:10.1007/978-94-007-1333-8\_57.
- 393 19. Frith, C. D. & Done, D. J. Routes to action in reaction time tasks. *Psychol Res* **48**, 169–177  
394 (1986).
- 395 20. Vleugels, L. W. E., Swinnen, S. P. & Hardwick, R. M. Skill acquisition is enhanced by reducing  
396 trial-to-trial repetition. *Journal of Neurophysiology* **123**, 1460–1471 (2020).

- 397 21. Hardwick, R. M. & Celnik, P. A. Cerebellar direct current stimulation enhances motor learning  
398 in older adults. *Neurobiology of Aging* **35**, 2217–2221 (2014).
- 399 22. Sarlegna, F. R. Impairment of online control of reaching movements with aging: A double-  
400 step study. *Neuroscience Letters* **403**, 309–314 (2006).
- 401 23. Wollenweber, F. A. *et al.* Subtle cognitive deficits in severe alcohol addicts - Do they show a  
402 specific profile? *J Neuropsychol* **8**, 147–153 (2014).
- 403 24. Wu, T., Kansaku, K. & Hallett, M. How Self-Initiated Memorized Movements Become  
404 Automatic: A Functional MRI Study. *Journal of Neurophysiology* **91**, 1690–1698 (2004).
- 405 25. Hardwick, R. M., Rajan, V. A., Bastian, A. J., Krakauer, J. W. & Celnik, P. A. Motor Learning  
406 in Stroke: Trained Patients Are Not Equal to Untrained Patients With Less Impairment.  
407 *Neurorehabil Neural Repair* **31**, 178–189 (2017).
- 408 26. Rajan, V. A., Hardwick, R. M. & Celnik, P. A. Reciprocal intralimb transfer of skilled isometric  
409 force production. *Journal of Neurophysiology* **122**, 60–65 (2019).
- 410 27. Reis, J. *et al.* Noninvasive cortical stimulation enhances motor skill acquisition over multiple  
411 days through an effect on consolidation. *Proceedings of the National Academy of Sciences*  
412 **106**, 1590–1595 (2009).
- 413 28. Shmuelof, L., Yang, J., Caffo, B., Mazzoni, P. & Krakauer, J. W. The neural correlates of  
414 learned motor acuity. *Journal of Neurophysiology* **112**, 971–980 (2014).
- 415 29. Shmuelof, L., Krakauer, J. W. & Mazzoni, P. How is a motor skill learned? Change and  
416 invariance at the levels of task success and trajectory control. *Journal of Neurophysiology*  
417 **108**, 578–594 (2012).
- 418
